# Supplementary material for: Caffeic Acid/Eu(III) Complexes: Solution Equilibrium Studies, Structure Characterization and Biological Activity
Source: MDPI journal article supplement (doi:10.3390/ijms23020888), 2022-01-14
Supplement: s1 [file s1]

## Supplementary materials for

# Caffeic acid / Eu(III) complexes: solution equilibrium studies, structure characterization and biological activity

Żaneta Arciszewska <sup>1</sup>, Sofia Gama<sup>1,\*</sup>, Monika Kalinowska<sup>2</sup>, Grzegorz Świdorski<sup>2</sup>, Renata Świsłocka<sup>2</sup>, Ewelina Gołębiewska <sup>2</sup>, Monika Naumowicz <sup>3</sup>, Mateusz Worobiczuk <sup>3</sup>, Adam Cudowski <sup>4</sup>, Anna Pietryczuk <sup>4</sup>, Concetta De Stefano <sup>5</sup>, Demetrio Milea <sup>5</sup>, Włodzimierz Lewandowski <sup>6</sup> and Beata Godlewska-Żyłkiewicz <sup>1,\*</sup>

<sup>1</sup> Department of Analytical and Inorganic Chemistry, Faculty of Chemistry, University of Białystok, K. Ciołkowskiego 1K, 15-245 Białystok, Poland; z.arciszewska@uwb.edu.pl (Ż.A.); sofia.gama@uwb.edu.pl (S.G.); bgodlew@uwb.edu.pl (B.G.-Ż.);

<sup>2</sup> Department of Chemistry, Biology and Biotechnology, Białystok University of Technology, Wiejska 45E, 15-351 Białystok, Poland; m.kalinowska@pb.edu.pl (M.K.); g.swiderski@pb.edu.pl (G.Ś.); r.swislocka@pb.edu.pl (R.Ś.); e.golebiewska@pb.edu.pl (E.G.);

<sup>3</sup> Department of Physical Chemistry, Faculty of Chemistry, University of Białystok, K. Ciołkowskiego 1K, 15-245 Białystok, Poland; monikan@uwb.edu.pl (M.N.); Mateusz Worobiczuk, mworobiczuk@gmail.com (M.W.);

<sup>4</sup> Department of Water Ecology, Faculty of Biology, University of Białystok, K. Ciołkowskiego 1J, 15-245 Białystok, Poland; cudad@uwb.edu.pl (A.C.); annapiet@uwb.edu.pl (A.P.);

<sup>5</sup> Dipartimento di Scienze Chimiche, Biologiche, Farmaceutiche ed Ambientali, CHIBIOFARAM, Università degli Studi di Messina, V.le F. Stagno d'Alcontres, 31, 98166 Messina, Italy; cdestefano@unime.it (C.D.S.); dmilea@unime.it (D.M.);

<sup>6</sup> Prof Wacław Dąbrowski Institute of Agricultural and Food Biotechnology - State Research Institute, 36 Rakowiecka St., 02-532 Warsaw, Poland; w.lewandowski@pb.edu.pl (W.L.);

\* Correspondence: sofia.gama@uwb.edu.pl (S.G.), +48857388090; bgodlew@uwb.edu.pl (B.G.-Ż.), +48857388257

## List of acronyms

|          |                                                       |
|----------|-------------------------------------------------------|
| ABTS     | 2,2-azino-bis(3-ethylbenzothiazoline-6-sulfonic acid) |
| BDE      | Bond Dissociation Energy                              |
| CAT      | Catechol                                              |
| CFA      | Caffeic Acid                                          |
| CUPRAC   | Cupric Reducing Antioxidant Power                     |
| DMSO     | Dimethyl sulfoxide                                    |
| DNA      | Deoxyribonucleic Acid                                 |
| DPPH     | 2,2-diphenyl-1-picrylhydrazyl                         |
| EA       | Elemental Analysis                                    |
| ESI-MS   | Electrospray Ionization Mass Spectrometry             |
| FRAP     | Ferric Reducing Antioxidant Power                     |
| FT-IR    | Fourier-Transform Infrared Spectroscopy               |
| FT-Raman | Fourier-Transform Raman spectroscopy                  |
| GAL      | Gallic Acid (3,4,5-trihydroxybenzoic acid)            |
| HAT      | Hydrogen Atom Transfer                                |
| IR       | Infrared                                              |
| MIC      | Minimum Inhibitory Concentration                      |
| NMR      | Nuclear Magnetic Resonance                            |
| SD       | Standard Deviation                                    |
| SET      | Single Electron Transfer                              |
| SET-PT   | Single Electron Transfer-Proton Transfer              |
| SPLET    | Sequential Proton Loss-Electron Transfer              |
| TGA      | Thermal Gravimetric Analysis                          |
| UV-Vis   | Ultraviolet-Visible                                   |

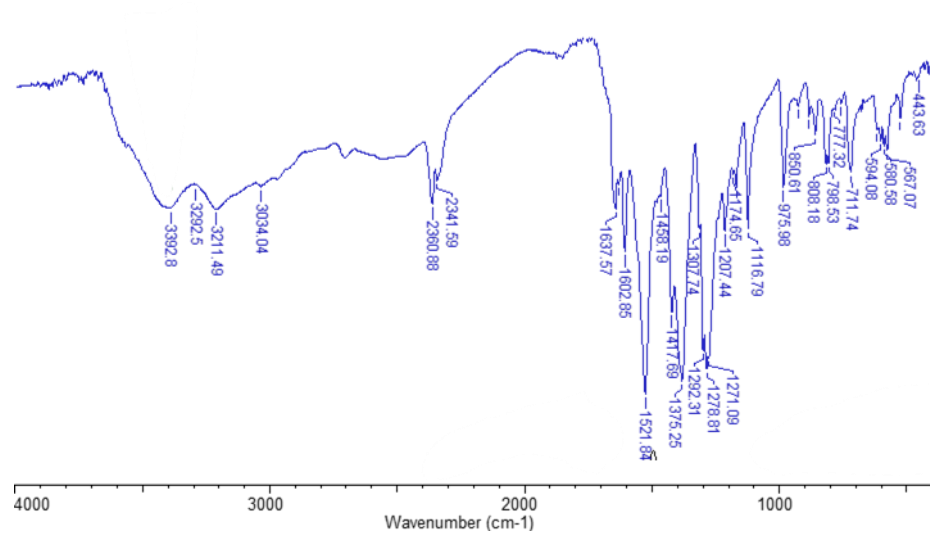

**Figure S1.** FT-IR (IR<sub>KBr</sub>) spectra of CFA sodium salt.

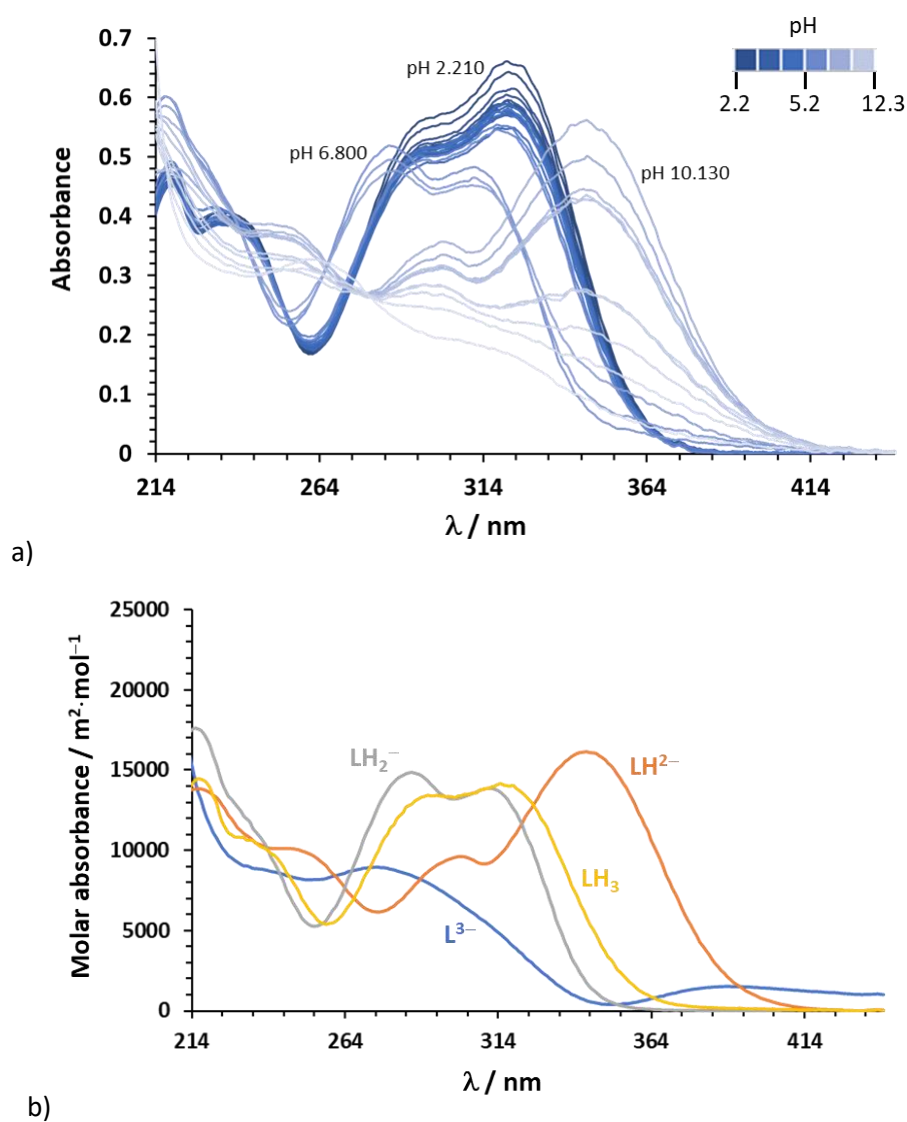

**Figure S2.** a) Representative experimental UV-Vis spectrophotometric titration of CFA and b) calculated molar absorbance spectra for the individual protonated CFA species [15].

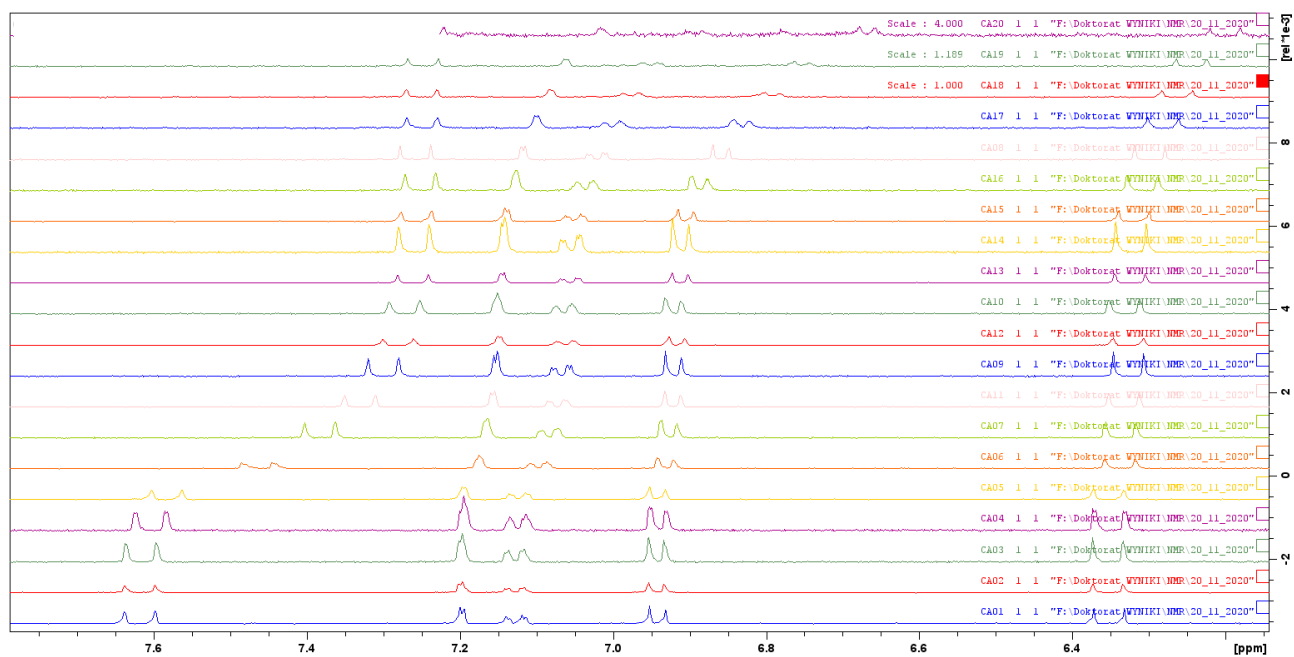

**Figure S3.**  $^1\text{H}$ -NMR spectra of the free ligand obtained at different pH values, from pH = 2.33 to pH = 11.00.  $c_{\text{CFA}} = 1 \text{ mmol}\cdot\text{dm}^{-3}$

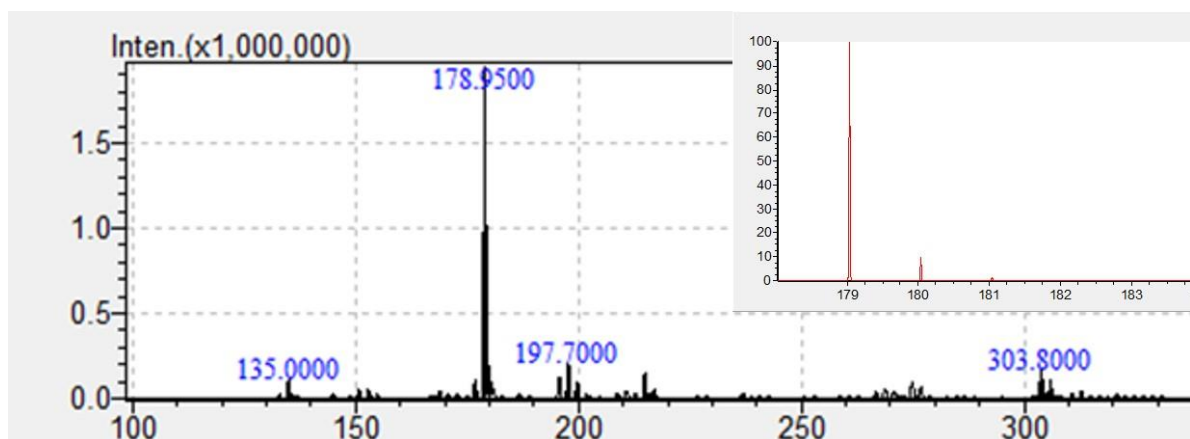

a)  $\text{LH}_2^-$ ,  $\text{C}_9\text{H}_7\text{O}_4^-$ ,  $m/z = 179.16$

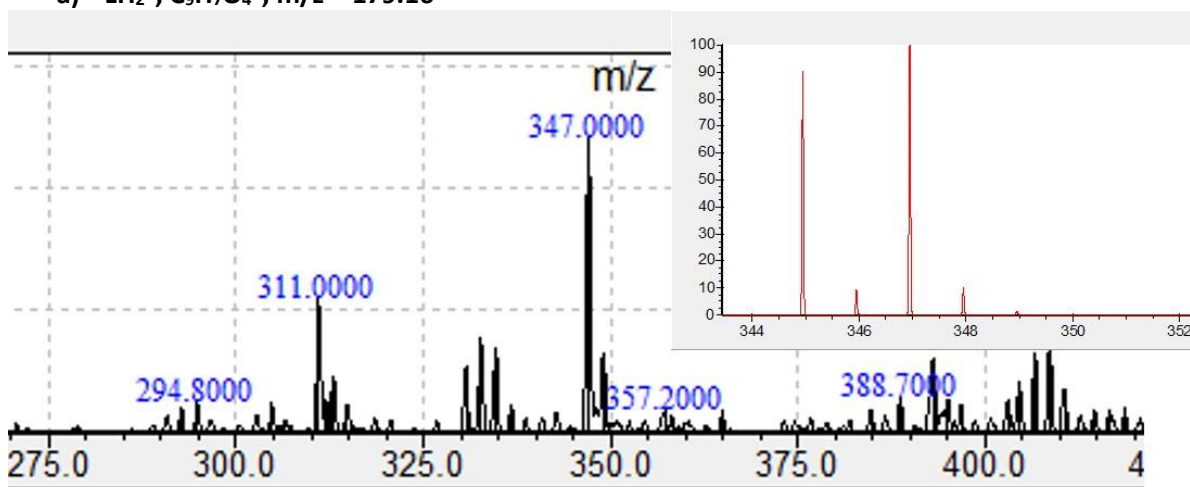

b)  $[\text{EuL}(\text{OH})]^-$ ,  $\text{C}_9\text{H}_6\text{O}_5\text{Eu}^-$ ,  $m/z = 346.11$

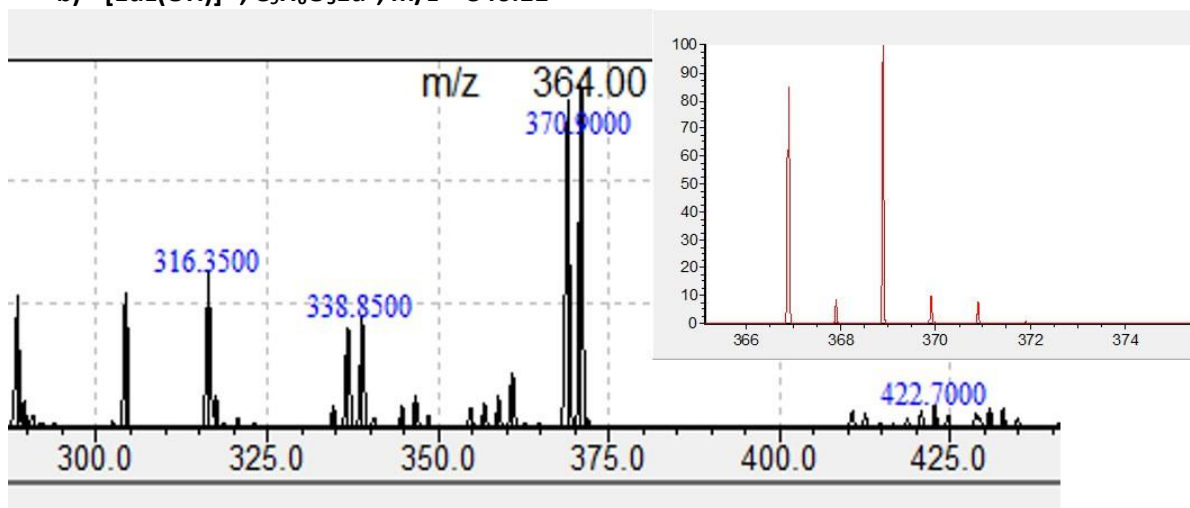

c)  $[\text{Eu}(\text{L})]^+\text{K}^+$ ,  $\text{C}_9\text{H}_5\text{O}_4\text{EuK}^+$ ,  $m/z = 368.20$

**Figure S4.** Experimental and theoretical (inset) ESI-MS spectra of the a)  $\text{LH}_2^-$ , b)  $[\text{EuL}(\text{OH})]^-$  and c)  $[\text{Eu}(\text{L})]^+\text{K}^+$  species in the  $\text{Eu}^{3+}/\text{CFA}$  system in aqueous solution.

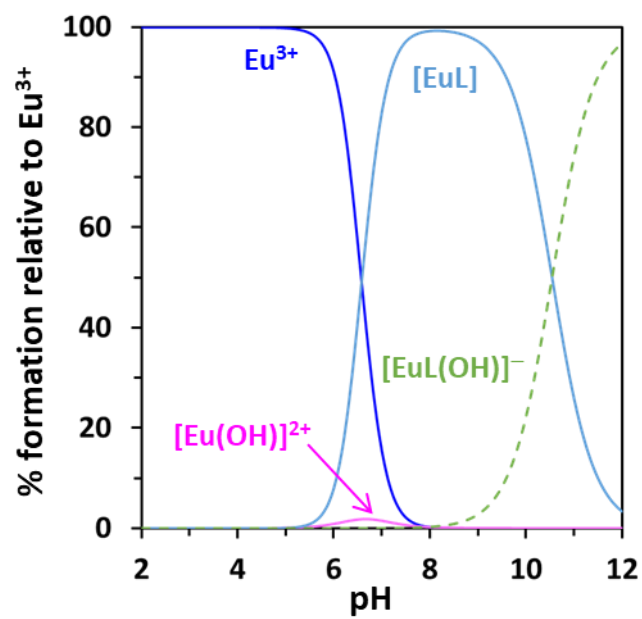

**Figure S5.** Distribution diagram of  $\text{Eu}_p\text{L}_q\text{H}_r$  species as a function of pH in the  $\text{Eu}^{3+}$ /CFA system ( $C_{\text{CFA}} = 2 \times C_{\text{Eu}^{3+}} = 1 \text{ mmol.dm}^{-3}$ )

**Table S1** Experimental chemical shift ( $\delta$  / ppm ) of the indicated nucleus at different pH values.  
CCFA = 1 mmol·dm<sup>-3</sup>

| pH    | $\delta$ / ppm |       |       |       |       |
|-------|----------------|-------|-------|-------|-------|
|       | Ha             | Hb    | Hc    | Hd    | He    |
| 2.34  | 6.353          | 7.621 | 7.202 | 6.944 | 7.131 |
| 2.47  | 6.352          | 7.617 | 7.199 | 6.944 | 7.130 |
| 2.68  | 6.354          | 7.617 | 7.197 | 6.943 | 7.129 |
| 3.14  | 6.353          | 7.607 | 7.196 | 6.943 | 7.126 |
| 3.52  | 6.355          | 7.586 | 7.200 | 6.944 | 7.125 |
| 4.23  | 6.341          | 7.464 | 7.175 | 6.933 | 7.099 |
| 4.81  | 6.338          | 7.385 | 7.165 | 6.926 | 7.084 |
| 5.12  | 6.333          | 7.332 | 7.157 | 6.923 | 7.074 |
| 5.26  | 6.327          | 7.301 | 7.154 | 6.921 | 7.066 |
| 5.7   | 6.328          | 7.282 | 7.150 | 6.918 | 7.063 |
| 5.92  | 6.334          | 7.275 | 7.153 | 6.922 | 7.065 |
| 6.6   | 6.324          | 7.263 | 7.145 | 6.913 | 7.056 |
| 6.73  | 6.322          | 7.261 | 7.142 | 6.912 | 7.054 |
| 7.38  | 6.319          | 7.260 | 7.142 | 6.907 | 7.051 |
| 8.00  | 6.308          | 7.255 | 7.129 | 6.889 | 7.039 |
| 8.54  | 6.298          | 7.259 | 7.117 | 6.859 | 7.022 |
| 8.73  | 6.281          | 7.252 | 7.099 | 6.824 | 6.997 |
| 9.14  | 6.263          | 7.254 | 7.083 | 6.793 | 6.979 |
| 9.38  | 6.246          | 7.247 | 7.063 | 6.755 | 6.951 |
| 9.63  | 6.235          | 7.245 | 7.050 | 6.736 | 6.937 |
| 10.39 | 6.214          | 7.246 | 7.029 | 6.692 | 6.912 |
| 10.8  | 6.206          | 7.243 | 7.019 | 6.676 | 6.899 |
| 11.02 | 6.202          | 7.241 | 7.018 | 6.671 | 6.893 |
| 11.03 | 6.203          | 7.245 | 7.018 | 6.668 | 6.896 |
| 11.46 | 6.192          | 7.238 | 7.003 | 6.657 | 6.882 |
| 12.09 | 6.192          | 7.244 | 6.994 | 6.643 | 6.868 |

**Table S2.** Calculated molar absorbance spectra for the individual species of CFA [15] and Eu<sup>3+</sup>/CFA system.

| $\lambda$ / nm | L <sup>3-</sup> | LH <sup>2-</sup> | LH <sub>2</sub> <sup>-</sup> | LH <sub>3</sub> | EuL   | [EuL(OH)] <sup>-</sup> |
|----------------|-----------------|------------------|------------------------------|-----------------|-------|------------------------|
| 210            | 20621           | 13023            | 16052                        | 12130           | 13636 | 22875                  |
| 211            | 18876           | 13298            | 16569                        | 12656           | 14589 | 20811                  |
| 212            | 17588           | 13484            | 16906                        | 13227           | 15347 | 19074                  |
| 213            | 16371           | 13638            | 17252                        | 13716           | 15922 | 17625                  |
| 214            | 15354           | 13757            | 17491                        | 14089           | 16405 | 16399                  |
| 215            | 14500           | 13805            | 17610                        | 14333           | 16718 | 15487                  |
| 216            | 13727           | 13824            | 17566                        | 14456           | 16947 | 14861                  |
| 217            | 13186           | 13807            | 17466                        | 14426           | 17090 | 14350                  |
| 218            | 12554           | 13761            | 17248                        | 14351           | 17104 | 13826                  |
| 219            | 12056           | 13686            | 16948                        | 14198           | 17008 | 13368                  |
| 220            | 11572           | 13562            | 16488                        | 13875           | 16907 | 13043                  |
| 221            | 11155           | 13428            | 15930                        | 13396           | 16722 | 12775                  |
| 222            | 10820           | 13293            | 15369                        | 12982           | 16467 | 12481                  |
| 223            | 10494           | 13086            | 14766                        | 12314           | 16139 | 12150                  |
| 224            | 10188           | 12801            | 14176                        | 11766           | 15853 | 11894                  |
| 225            | 9933            | 12515            | 13726                        | 11384           | 15542 | 11625                  |
| 226            | 9687            | 12167            | 13359                        | 11083           | 15191 | 11340                  |
| 227            | 9576            | 11968            | 13193                        | 10979           | 14833 | 11077                  |
| 228            | 9404            | 11677            | 12928                        | 10837           | 14527 | 10839                  |
| 229            | 9289            | 11399            | 12704                        | 10820           | 14186 | 10614                  |
| 230            | 9150            | 11219            | 12447                        | 10802           | 13799 | 10393                  |
| 231            | 9055            | 11034            | 12125                        | 10800           | 13454 | 10180                  |
| 232            | 9059            | 10918            | 11961                        | 10630           | 13084 | 9976                   |
| 233            | 8985            | 10778            | 11756                        | 10619           | 12697 | 9780                   |
| 234            | 8902            | 10617            | 11366                        | 10617           | 12326 | 9570                   |
| 235            | 8888            | 10446            | 11144                        | 10463           | 11986 | 9432                   |
| 236            | 8867            | 10373            | 10904                        | 10293           | 11708 | 9294                   |
| 237            | 8847            | 10296            | 10668                        | 10184           | 11403 | 9195                   |
| 238            | 8804            | 10196            | 10348                        | 10103           | 11068 | 9074                   |
| 239            | 8762            | 10136            | 9974                         | 9961            | 10754 | 8932                   |
| 240            | 8706            | 10121            | 9540                         | 9793            | 10520 | 8795                   |
| 241            | 8675            | 10102            | 9198                         | 9686            | 10293 | 8721                   |
| 242            | 8629            | 10113            | 8854                         | 9489            | 10050 | 8636                   |
| 243            | 8590            | 10100            | 8485                         | 9267            | 9846  | 8556                   |
| 244            | 8526            | 10095            | 8056                         | 8965            | 9700  | 8509                   |
| 245            | 8455            | 10099            | 7515                         | 8603            | 9554  | 8447                   |
| 246            | 8395            | 10099            | 7121                         | 8344            | 9379  | 8394                   |
| 247            | 8353            | 10090            | 6762                         | 8031            | 9243  | 8363                   |
| 248            | 8313            | 10063            | 6474                         | 7774            | 9174  | 8391                   |
| 249            | 8265            | 10020            | 6109                         | 7398            | 9079  | 8406                   |
| 250            | 8234            | 9950             | 5774                         | 6972            | 8948  | 8356                   |
| 251            | 8197            | 9897             | 5578                         | 6722            | 8853  | 8332                   |
| 252            | 8195            | 9809             | 5401                         | 6378            | 8806  | 8339                   |
| 253            | 8188            | 9731             | 5302                         | 6142            | 8786  | 8390                   |
| 254            | 8206            | 9632             | 5262                         | 5945            | 8738  | 8402                   |
| 255            | 8198            | 9481             | 5283                         | 5666            | 8715  | 8395                   |
| 256            | 8213            | 9331             | 5360                         | 5522            | 8729  | 8415                   |



|     |      |      |       |       |      |      |
|-----|------|------|-------|-------|------|------|
| 257 | 8231 | 9165 | 5475  | 5441  | 8722 | 8402 |
| 258 | 8276 | 9015 | 5645  | 5385  | 8721 | 8412 |
| 259 | 8336 | 8755 | 5930  | 5451  | 8712 | 8424 |
| 260 | 8408 | 8532 | 6257  | 5471  | 8713 | 8394 |
| 261 | 8439 | 8396 | 6466  | 5569  | 8698 | 8340 |
| 262 | 8498 | 8172 | 6807  | 5713  | 8713 | 8312 |
| 263 | 8553 | 7928 | 7210  | 5930  | 8737 | 8316 |
| 264 | 8592 | 7666 | 7663  | 6183  | 8739 | 8302 |
| 265 | 8689 | 7414 | 8185  | 6462  | 8706 | 8222 |
| 266 | 8727 | 7201 | 8622  | 6727  | 8686 | 8128 |
| 267 | 8773 | 7006 | 9074  | 6985  | 8679 | 8069 |
| 268 | 8814 | 6836 | 9496  | 7360  | 8694 | 8027 |
| 269 | 8854 | 6633 | 10041 | 7726  | 8688 | 8007 |
| 270 | 8907 | 6475 | 10577 | 8175  | 8659 | 7925 |
| 271 | 8924 | 6356 | 11012 | 8519  | 8673 | 7851 |
| 272 | 8954 | 6273 | 11433 | 8843  | 8700 | 7793 |
| 273 | 8961 | 6202 | 11827 | 9200  | 8712 | 7709 |
| 274 | 8977 | 6172 | 12333 | 9655  | 8720 | 7635 |
| 275 | 8970 | 6154 | 12762 | 9967  | 8744 | 7546 |
| 276 | 8941 | 6184 | 13115 | 10406 | 8745 | 7468 |
| 277 | 8938 | 6237 | 13457 | 10791 | 8715 | 7363 |
| 278 | 8905 | 6302 | 13739 | 11018 | 8678 | 7215 |
| 279 | 8844 | 6417 | 14019 | 11393 | 8678 | 7159 |
| 280 | 8814 | 6529 | 14236 | 11586 | 8683 | 7090 |
| 281 | 8750 | 6699 | 14428 | 11948 | 8646 | 6980 |
| 282 | 8694 | 6843 | 14563 | 12149 | 8603 | 6855 |
| 283 | 8632 | 7005 | 14660 | 12339 | 8568 | 6780 |
| 284 | 8578 | 7240 | 14768 | 12675 | 8587 | 6736 |
| 285 | 8514 | 7443 | 14827 | 12795 | 8591 | 6671 |
| 286 | 8442 | 7636 | 14848 | 12892 | 8567 | 6584 |
| 287 | 8358 | 7853 | 14797 | 13075 | 8542 | 6517 |
| 288 | 8284 | 8050 | 14741 | 13193 | 8533 | 6449 |
| 289 | 8196 | 8256 | 14653 | 13300 | 8496 | 6383 |
| 290 | 8114 | 8468 | 14517 | 13347 | 8485 | 6335 |
| 291 | 8011 | 8630 | 14338 | 13416 | 8476 | 6298 |
| 292 | 7908 | 8791 | 14136 | 13398 | 8459 | 6235 |
| 293 | 7792 | 8931 | 13937 | 13383 | 8420 | 6141 |
| 294 | 7680 | 9064 | 13740 | 13426 | 8383 | 6086 |
| 295 | 7555 | 9162 | 13565 | 13384 | 8380 | 6085 |
| 296 | 7448 | 9255 | 13428 | 13355 | 8342 | 6017 |
| 297 | 7323 | 9353 | 13316 | 13342 | 8307 | 5950 |
| 298 | 7192 | 9428 | 13235 | 13353 | 8256 | 5848 |
| 299 | 7060 | 9494 | 13195 | 13335 | 8231 | 5773 |
| 300 | 6927 | 9554 | 13187 | 13277 | 8251 | 5716 |
| 301 | 6804 | 9603 | 13232 | 13388 | 8251 | 5662 |
| 302 | 6640 | 9616 | 13270 | 13397 | 8224 | 5576 |
| 303 | 6501 | 9600 | 13330 | 13475 | 8208 | 5519 |
| 304 | 6371 | 9541 | 13408 | 13485 | 8200 | 5466 |
| 305 | 6236 | 9469 | 13479 | 13519 | 8179 | 5401 |
| 306 | 6101 | 9383 | 13557 | 13584 | 8095 | 5307 |
| 307 | 5970 | 9270 | 13633 | 13573 | 8055 | 5239 |

|     |      |       |       |       |      |      |
|-----|------|-------|-------|-------|------|------|
| 308 | 5802 | 9192  | 13711 | 13738 | 7987 | 5134 |
| 309 | 5675 | 9152  | 13784 | 13789 | 7889 | 5016 |
| 310 | 5562 | 9152  | 13832 | 13847 | 7858 | 4942 |
| 311 | 5405 | 9191  | 13861 | 13862 | 7810 | 4860 |
| 312 | 5245 | 9273  | 13858 | 13951 | 7728 | 4767 |
| 313 | 5076 | 9415  | 13806 | 13999 | 7654 | 4652 |
| 314 | 4912 | 9596  | 13712 | 14109 | 7621 | 4548 |
| 315 | 4772 | 9777  | 13594 | 14143 | 7568 | 4439 |
| 316 | 4604 | 9967  | 13428 | 14062 | 7525 | 4354 |
| 317 | 4427 | 10228 | 13207 | 14020 | 7506 | 4318 |
| 318 | 4229 | 10528 | 12911 | 13994 | 7477 | 4203 |
| 319 | 4032 | 10820 | 12588 | 14032 | 7395 | 4065 |
| 320 | 3894 | 11052 | 12337 | 13849 | 7345 | 3985 |
| 321 | 3712 | 11359 | 11962 | 13729 | 7340 | 3914 |
| 322 | 3554 | 11701 | 11544 | 13563 | 7298 | 3822 |
| 323 | 3329 | 12077 | 11031 | 13392 | 7238 | 3703 |
| 324 | 3152 | 12382 | 10566 | 13167 | 7210 | 3645 |
| 325 | 3039 | 12611 | 10226 | 12988 | 7185 | 3577 |
| 326 | 2844 | 12904 | 9672  | 12712 | 7139 | 3449 |
| 327 | 2666 | 13218 | 9129  | 12386 | 7106 | 3366 |
| 328 | 2492 | 13574 | 8535  | 12000 | 7070 | 3265 |
| 329 | 2324 | 13883 | 7943  | 11729 | 7032 | 3181 |
| 330 | 2208 | 14122 | 7517  | 11450 | 6973 | 3099 |
| 331 | 2032 | 14380 | 6927  | 10977 | 6990 | 3045 |
| 332 | 1882 | 14649 | 6350  | 10532 | 6997 | 2977 |
| 333 | 1696 | 14927 | 5687  | 10084 | 6985 | 2892 |
| 334 | 1561 | 15126 | 5183  | 9648  | 6967 | 2782 |
| 335 | 1441 | 15290 | 4765  | 9270  | 6926 | 2669 |
| 336 | 1304 | 15495 | 4270  | 8874  | 6879 | 2547 |
| 337 | 1201 | 15642 | 3833  | 8380  | 6819 | 2420 |
| 338 | 1056 | 15803 | 3330  | 7854  | 6842 | 2393 |
| 339 | 982  | 15928 | 2964  | 7450  | 6868 | 2357 |
| 340 | 895  | 16020 | 2674  | 7098  | 6874 | 2307 |
| 341 | 804  | 16067 | 2337  | 6636  | 6855 | 2229 |
| 342 | 733  | 16094 | 2044  | 6262  | 6784 | 2118 |
| 343 | 649  | 16117 | 1741  | 5831  | 6784 | 2094 |
| 344 | 587  | 16059 | 1487  | 5387  | 6819 | 2072 |
| 345 | 558  | 16046 | 1325  | 5121  | 6811 | 2036 |
| 346 | 514  | 16013 | 1157  | 4753  | 6829 | 1966 |
| 347 | 480  | 15879 | 999   | 4390  | 6824 | 1883 |
| 348 | 436  | 15770 | 836   | 4008  | 6789 | 1805 |
| 349 | 429  | 15624 | 723   | 3689  | 6710 | 1739 |
| 350 | 418  | 15409 | 617   | 3356  | 6679 | 1684 |
| 351 | 419  | 15229 | 542   | 3168  | 6690 | 1643 |
| 352 | 415  | 15015 | 463   | 2902  | 6628 | 1595 |
| 353 | 408  | 14728 | 394   | 2587  | 6596 | 1546 |
| 354 | 426  | 14455 | 337   | 2402  | 6564 | 1535 |
| 355 | 462  | 14154 | 301   | 2208  | 6504 | 1465 |
| 356 | 459  | 13857 | 256   | 1990  | 6462 | 1430 |
| 357 | 483  | 13501 | 218   | 1800  | 6358 | 1383 |
| 358 | 524  | 13128 | 193   | 1635  | 6334 | 1374 |

|     |      |       |     |      |      |      |
|-----|------|-------|-----|------|------|------|
| 359 | 548  | 12756 | 161 | 1467 | 6244 | 1354 |
| 360 | 589  | 12323 | 144 | 1302 | 6170 | 1312 |
| 361 | 642  | 11965 | 135 | 1179 | 6106 | 1315 |
| 362 | 671  | 11553 | 117 | 1076 | 5989 | 1271 |
| 363 | 718  | 11192 | 103 | 990  | 5860 | 1232 |
| 364 | 784  | 10645 | 98  | 876  | 5675 | 1165 |
| 365 | 817  | 10230 | 78  | 818  | 5556 | 1106 |
| 366 | 864  | 9851  | 79  | 698  | 5484 | 1104 |
| 367 | 928  | 9408  | 71  | 653  | 5392 | 1080 |
| 368 | 935  | 8970  | 41  | 569  | 5211 | 1067 |
| 369 | 1014 | 8465  | 44  | 535  | 5075 | 1053 |
| 370 | 1061 | 8065  | 55  | 462  | 4969 | 1012 |
| 371 | 1105 | 7645  | 46  | 443  | 4860 | 988  |
| 372 | 1123 | 7265  | 24  | 389  | 4693 | 920  |
| 373 | 1184 | 6886  | 35  | 370  | 4598 | 971  |
| 374 | 1236 | 6399  | 33  | 350  | 4596 | 1024 |
| 375 | 1271 | 6032  | 25  | 332  | 4493 | 1018 |
| 376 | 1304 | 5684  | 26  | 294  | 4287 | 927  |
| 377 | 1342 | 5357  | 26  | 282  | 4099 | 867  |
| 378 | 1368 | 5014  | 21  | 260  | 3969 | 822  |
| 379 | 1393 | 4662  | 9   | 247  | 3860 | 791  |
| 380 | 1420 | 4285  | 11  | 229  | 3749 | 816  |
| 381 | 1441 | 4032  | 11  | 214  | 3606 | 786  |
| 382 | 1469 | 3783  | 19  | 215  | 3497 | 789  |
| 383 | 1476 | 3503  | 15  | 198  | 3381 | 770  |
| 384 | 1499 | 3210  | 13  | 199  | 3272 | 750  |
| 385 | 1514 | 2940  | 14  | 191  | 3160 | 712  |
| 386 | 1520 | 2752  | 12  | 179  | 3016 | 660  |
| 387 | 1526 | 2531  | 9   | 173  | 2922 | 651  |
| 388 | 1538 | 2352  | 11  | 173  | 2788 | 630  |
| 389 | 1536 | 2141  | 12  | 154  | 2717 | 613  |
| 390 | 1535 | 1955  | 12  | 165  | 2644 | 586  |
| 391 | 1531 | 1784  | 7   | 155  | 2561 | 569  |
| 392 | 1532 | 1656  | 11  | 144  | 2457 | 535  |
| 393 | 1524 | 1542  | 10  | 170  | 2383 | 530  |
| 394 | 1518 | 1396  | 10  | 148  | 2349 | 560  |
| 395 | 1511 | 1267  | 12  | 133  | 2271 | 548  |
| 396 | 1509 | 1169  | 10  | 131  | 2167 | 547  |
| 397 | 1496 | 1076  | 7   | 119  | 2067 | 508  |
| 398 | 1477 | 988   | 5   | 148  | 1997 | 473  |
| 399 | 1471 | 896   | 8   | 120  | 1898 | 434  |
| 400 | 1451 | 803   | 6   | 116  | 1792 | 422  |
| 401 | 1445 | 746   | 13  | 123  | 1738 | 405  |
| 402 | 1430 | 685   | 12  | 107  | 1695 | 365  |
| 403 | 1424 | 630   | 18  | 110  | 1642 | 370  |
| 404 | 1405 | 566   | 13  | 120  | 1554 | 344  |
| 405 | 1394 | 508   | 20  | 87   | 1503 | 333  |
| 406 | 1374 | 455   | 16  | 91   | 1467 | 324  |
| 407 | 1366 | 419   | 23  | 88   | 1416 | 319  |
| 408 | 1348 | 389   | 25  | 83   | 1328 | 304  |
| 409 | 1336 | 353   | 24  | 93   | 1256 | 276  |

|     |      |     |    |    |      |     |
|-----|------|-----|----|----|------|-----|
| 410 | 1319 | 309 | 30 | 77 | 1216 | 275 |
| 411 | 1306 | 277 | 36 | 71 | 1182 | 262 |
| 412 | 1296 | 257 | 34 | 67 | 1099 | 245 |
| 413 | 1272 | 226 | 28 | 56 | 1006 | 185 |
| 414 | 1263 | 203 | 33 | 61 | 964  | 142 |
| 415 | 1244 | 183 | 33 | 61 | 918  | 127 |
| 416 | 1235 | 169 | 33 | 57 | 888  | 146 |
| 417 | 1218 | 157 | 33 | 57 | 851  | 152 |
| 418 | 1216 | 142 | 39 | 46 | 816  | 141 |
| 419 | 1209 | 128 | 40 | 92 | 741  | 103 |
| 420 | 1191 | 117 | 37 | 39 | 710  | 91  |
| 421 | 1177 | 110 | 39 | 50 | 716  | 126 |
| 422 | 1166 | 104 | 38 | 57 | 689  | 136 |
| 423 | 1156 | 100 | 37 | 48 | 634  | 132 |
| 424 | 1151 | 96  | 40 | 59 | 590  | 104 |
| 425 | 1139 | 79  | 31 | 46 | 582  | 94  |
| 426 | 1116 | 70  | 27 | 36 | 591  | 128 |
| 427 | 1097 | 58  | 13 | 22 | 517  | 93  |
| 428 | 1083 | 54  | 13 | 16 | 456  | 55  |
| 429 | 1071 | 45  | 4  | 21 | 418  | 26  |
| 430 | 1055 | 39  | 1  | 21 | 388  | 21  |
| 431 | 1045 | 37  | 4  | 9  | 389  | 46  |
| 432 | 1041 | 32  | 5  | 1  | 318  | 0   |
| 433 | 1034 | 27  | 8  | 5  | 326  | 49  |
| 434 | 1052 | 45  | 18 | 26 | 322  | 59  |
| 435 | 1041 | 44  | 22 | 21 | 272  | 47  |
| 436 | 1053 | 58  | 31 | 45 | 233  | 4   |
| 437 | 1057 | 63  | 42 | 47 | 184  | 0   |
| 438 | 1076 | 79  | 63 | 84 | 183  | 0   |
| 439 | 1045 | 60  | 36 | 65 | 170  | 0   |
| 440 | 1033 | 50  | 33 | 24 | 146  | 0   |
